# Supplementary material for: Long-term outcomes of the global tuberculosis and COVID-19 co-infection cohort
Source: PubMed Central journal article supplement — Eur Respir J. 2023 Nov 30;62(5):2300925. doi: 10.1183/13993003.00925-2023 (PMC10627308; doi:10.1183/13993003.00925-2023), 2023-11-30

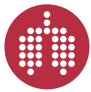

# Long-term outcomes of the global tuberculosis and COVID-19 co-infection cohort

Global Tuberculosis Network and TB/COVID-19 Global Study Group

Contributors of the Global Tuberculosis Network and TB/COVID-19 Global Study Group are listed at the end of the article.

Corresponding author: Giovanni Battista Migliori ([giovannibattista.migliori@icsmaugeri.it](mailto:giovannibattista.migliori@icsmaugeri.it))

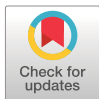

Shareable abstract (@ERSpublications)

In 778 TB/COVID-19 co-infected patients, 77% TB treatment success and 11% TB mortality was observed, with 71% recovering from COVID-19 and 13% COVID-19-associated mortality. Mortality was higher in those diagnosed with COVID-19 before/during TB treatment. <https://bit.ly/3PQSw17>

**Cite this article as:** Global Tuberculosis Network and TB/COVID-19 Global Study Group. Long-term outcomes of the global tuberculosis and COVID-19 co-infection cohort. *Eur Respir J* 2023; 62: 2300925 [DOI: 10.1183/13993003.00925-2023].

This extracted version can be shared freely online.

Copyright ©The authors 2023.

This version is distributed under the terms of the Creative Commons Attribution Non-Commercial Licence 4.0. For commercial reproduction rights and permissions contact [permissions@ersnet.org](mailto:permissions@ersnet.org)

This article has an editorial commentary:  
<https://doi.org/10.1183/13993003.01881-2023>

Received: 1 June 2023  
Accepted: 4 Oct 2023

## Abstract

**Background** Longitudinal cohort data of patients with tuberculosis (TB) and coronavirus disease 2019 (COVID-19) are lacking. In our global study, we describe long-term outcomes of patients affected by TB and COVID-19.

**Methods** We collected data from 174 centres in 31 countries on all patients affected by COVID-19 and TB between 1 March 2020 and 30 September 2022. Patients were followed-up until cure, death or end of cohort time. All patients had TB and COVID-19; for analysis purposes, deaths were attributed to TB, COVID-19 or both. Survival analysis was performed using Cox proportional risk-regression models, and the log-rank test was used to compare survival and mortality attributed to TB, COVID-19 or both.

**Results** Overall, 788 patients with COVID-19 and TB (active or sequelae) were recruited from 31 countries, and 10.8% (n=85) died during the observation period. Survival was significantly lower among patients whose death was attributed to TB and COVID-19 versus those dying because of either TB or COVID-19 alone (p<0.001). Significant adjusted risk factors for TB mortality were higher age (hazard ratio (HR) 1.05, 95% CI 1.03–1.07), HIV infection (HR 2.29, 95% CI 1.02–5.16) and invasive ventilation (HR 4.28, 95% CI 2.34–7.83). For COVID-19 mortality, the adjusted risks were higher age (HR 1.03, 95% CI 1.02–1.04), male sex (HR 2.21, 95% CI 1.24–3.91), oxygen requirement (HR 7.93, 95% CI 3.44–18.26) and invasive ventilation (HR 2.19, 95% CI 1.36–3.53).

**Conclusions** In our global cohort, death was the outcome in >10% of patients with TB and COVID-19. A range of demographic and clinical predictors are associated with adverse outcomes.

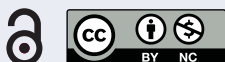

Supplement: ERJ-00925-2023.Shareable.pdf [file ERJ-00925-2023.Shareable.pdf]
